# Supplementary material for: Facile synthesis of 2D nitrogen-containing porous carbon nanosheets induced by graphene oxide for high-performance supercapacitors
Source: Royal Society of Chemistry journal article supplement (doi:10.1039/c8se00242h), 2018-01-01
Supplement: c8se00242h1.pdf [file c8se00242h1.pdf]

## Supporting Information

### Facile Synthesis of 2D Nitrogen-Containing Porous Carbon Nanosheets Induced by Graphene Oxide for High-Performance Supercapacitors

*Xu Zhang<sup>a\*</sup>, Qiuyu Fan<sup>a</sup>, Yingyuan Zhao<sup>c</sup>, Man Wang<sup>b</sup>, Yulan Meng<sup>a</sup>, Yonghou Xiao<sup>a</sup>,  
Xiaoting Lei<sup>a</sup>, and Juan Yang<sup>b\*</sup>*

<sup>a</sup>State Key Laboratory of Fine Chemicals, School of Petroleum and Chemical Engineering, Dalian University of Technology, Panjin 124221, China

<sup>b</sup>School of Chemical Engineering and Technology, Xi'an Jiaotong University, Xi'an 710049, China.

<sup>c</sup>College of Chemical Engineering and Safety, Binzhou University, Binzhou 256603, PR China

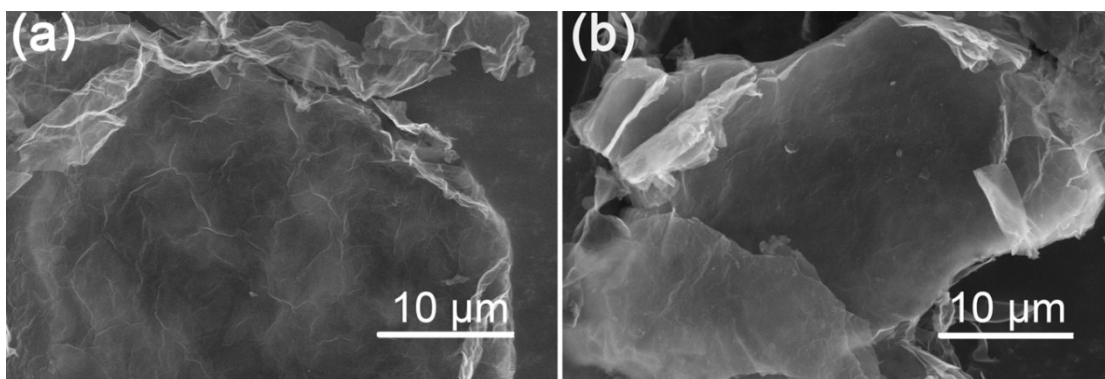

Figure S1. SEM images of (a) FG and (b) FGA.

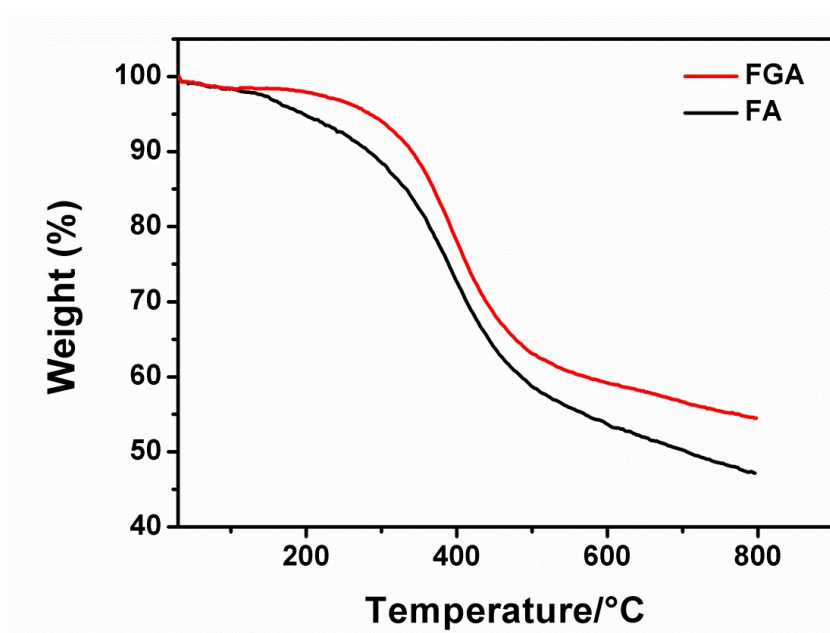

Figure S2. TGA profiles of FA and FGA.

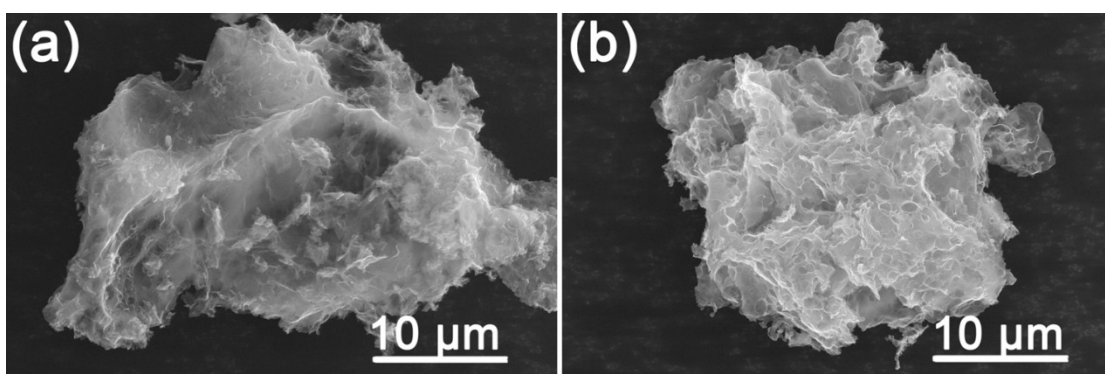

Figure S3. SEM images of (a) FG-a and (b) FGA-a.

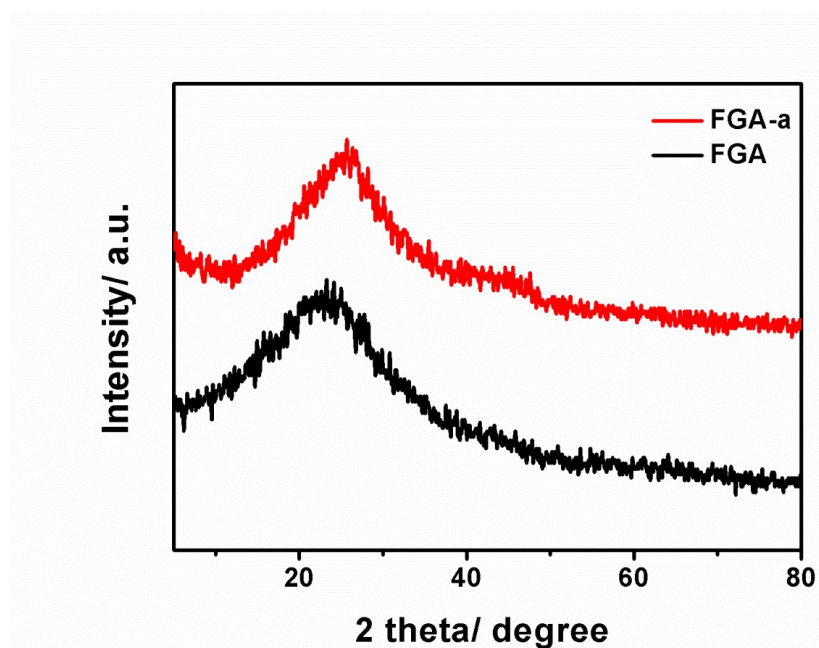

Figure S4. XRD patterns of FGA and FGA-a.

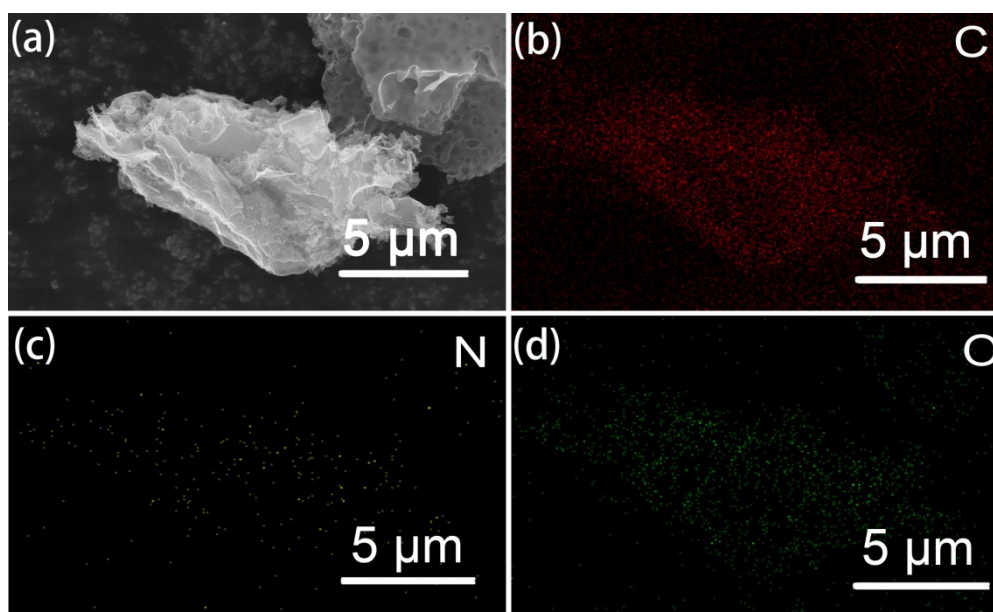

Figure S5. (a) SEM image of FGA-a and the corresponding EDS element mapping of (b) C; (c) N and (d) O.



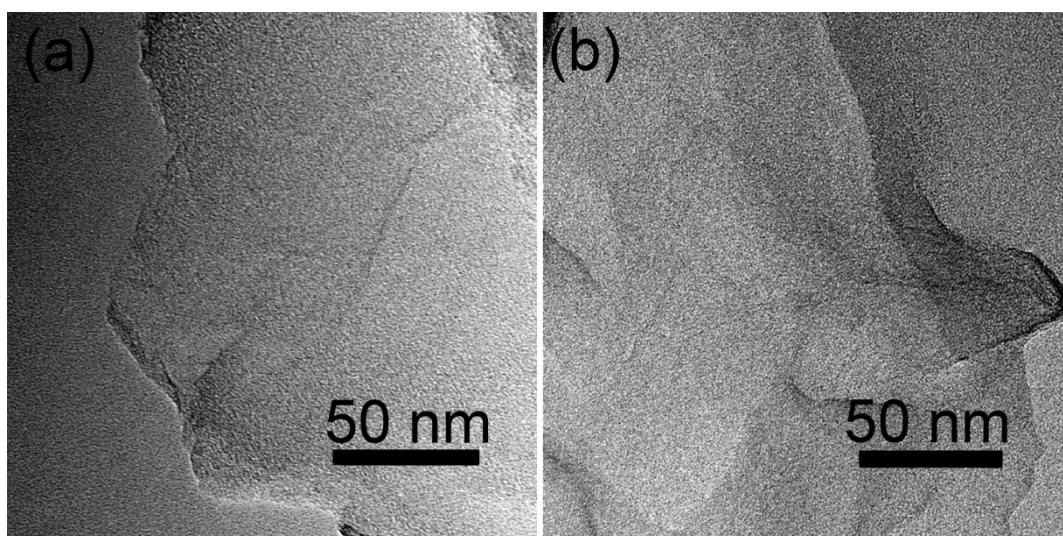

Figure S6. TEM images of (a) FG-a and (b) FGA-a.

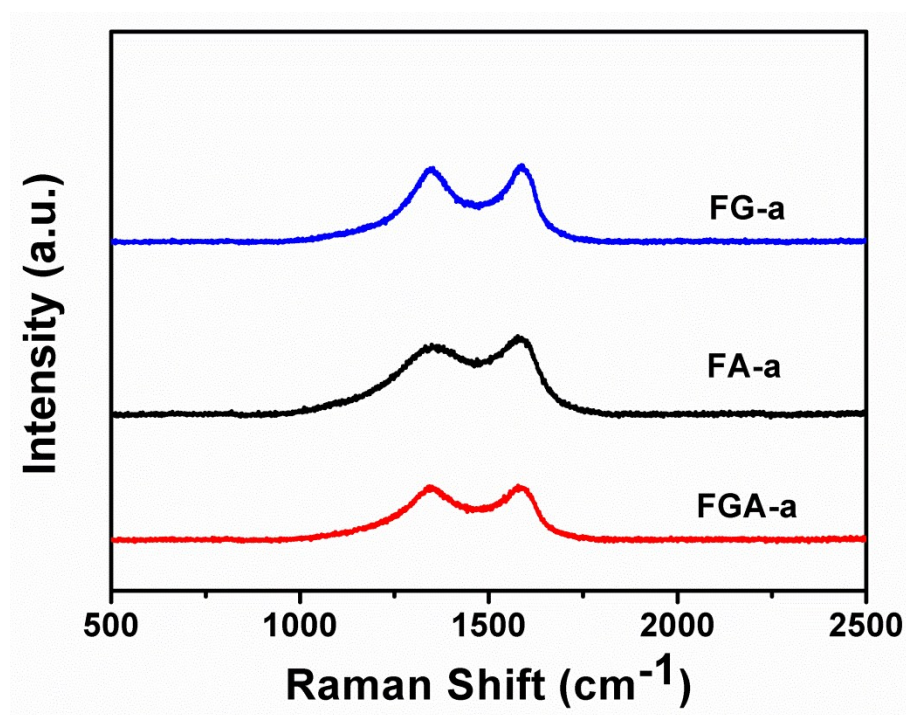

Figure S7. Raman spectra of the FG-a, FA-a, and FGA-a

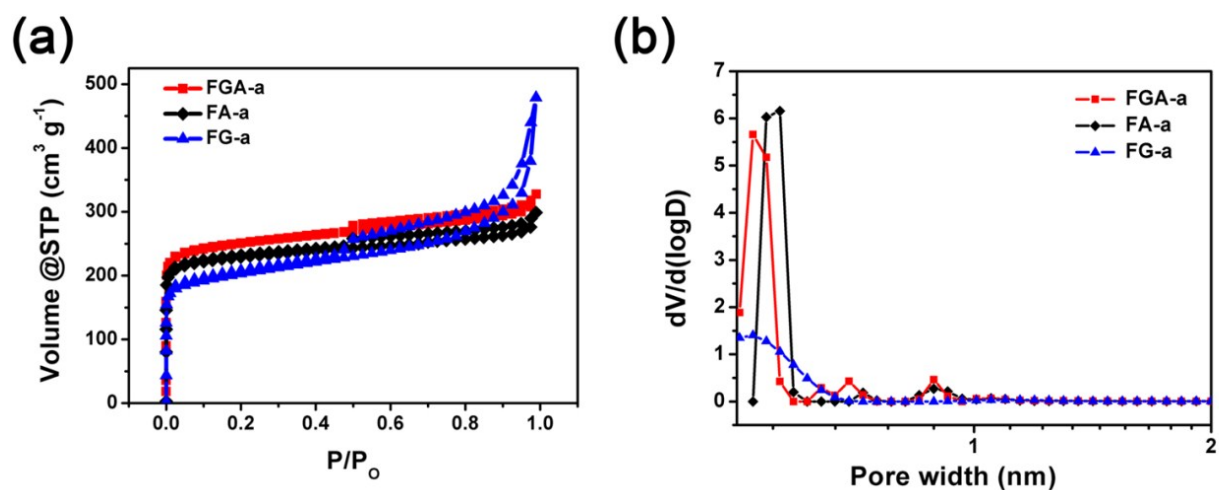

Figure S8. (a) Nitrogen adsorption-desorption isotherms and (b) pore size distributions of FG-a, FA-a and FGA-a

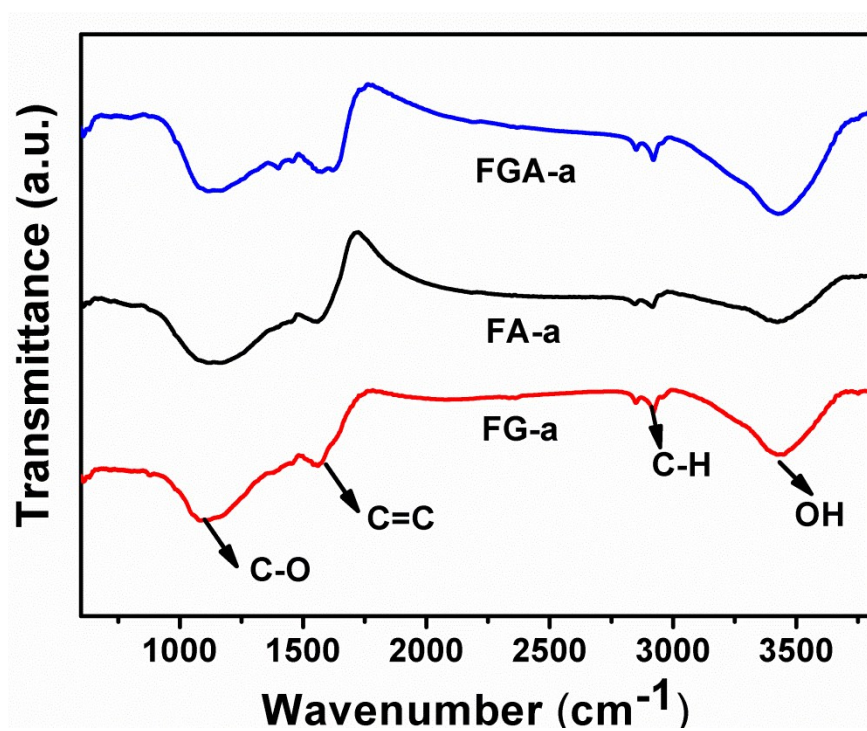

Figure S9. FTIR spectra of FG-a, FA-a and FGA-a

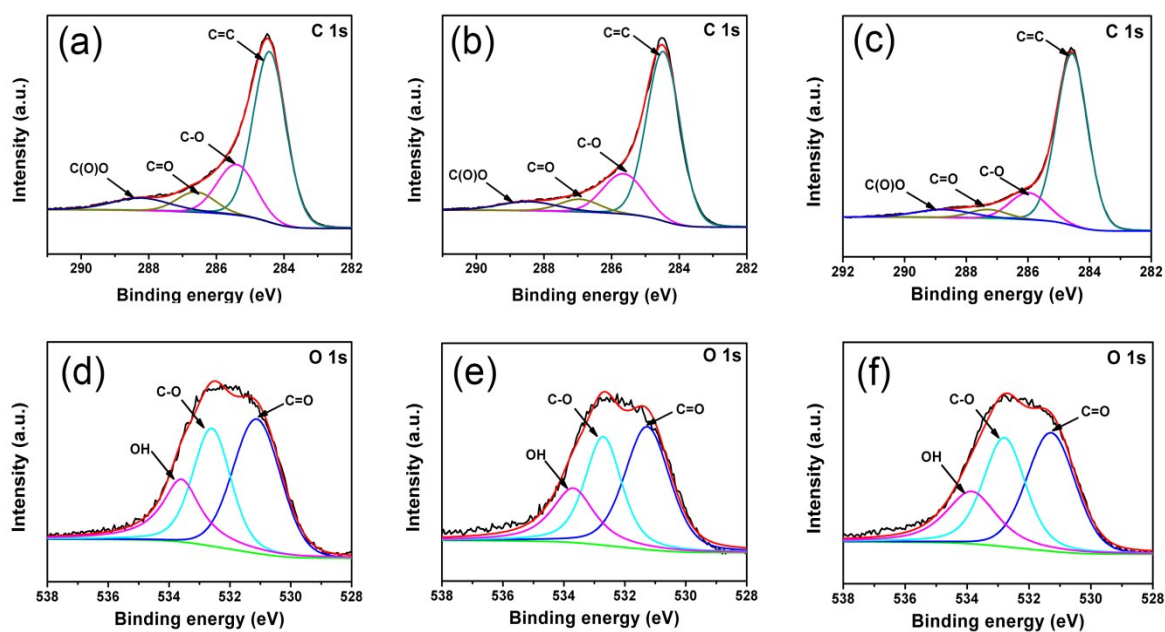

Figure S10. High-resolution C 1s spectra of the (a) FG-a, (b) FA-a, and (c) FGA-a samples. High-resolution O 1s spectra of the (d) FG-a, (e) FA-a, and (f) FGA-a samples

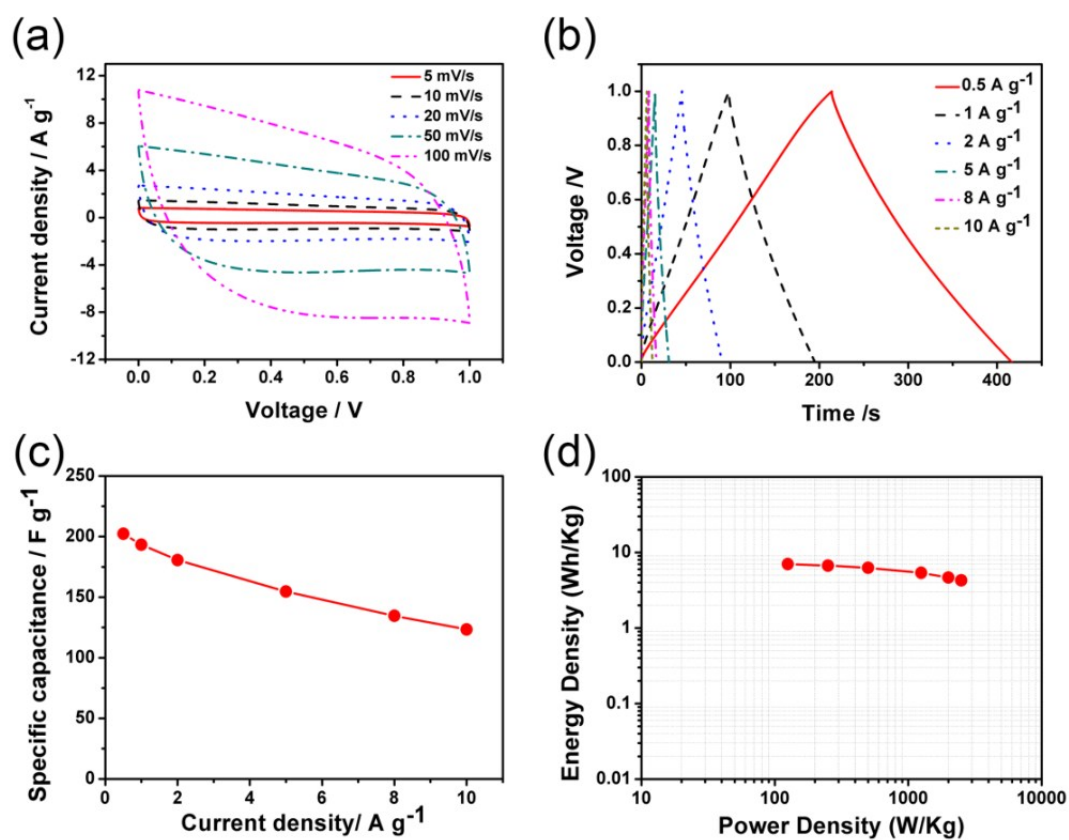

Figure S11. (a) Cyclic voltammograms of FGA-a at the scan rates from 5  $\text{mV s}^{-1}$  to 100  $\text{mV s}^{-1}$  in the two-electrode cell; (b) Galvanostatic charge-discharge curves and

(c) Specific capacitances of FGA-a at different current densities in the two-electrode cell; (d) Ragone plots of FGA-a measured in the two-electrode cell.

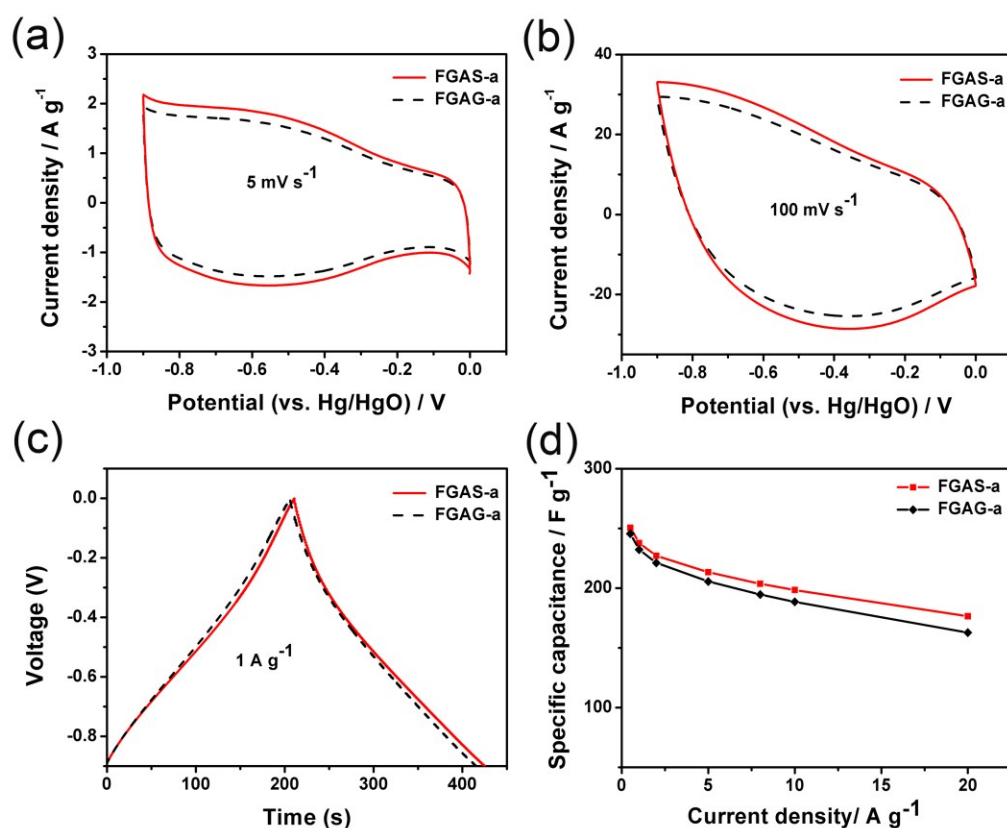

Figure S12. Cyclic voltammograms of FGAG-a and FGAS-a at the scan rates of (a) 5 mV s<sup>-1</sup> and (b) 100 mV s<sup>-1</sup>; (c) Galvanostatic charge-discharge curves of FGAG-a and FGAS-a at a current density of 1 A g<sup>-1</sup>; and (d) Specific capacitances of FGAG-a and FGAS-a at different current densities.
